# Supplementary material for: SARS-CoV-2 patient self-testing with an antigen-detecting rapid test: a head-to-head comparison with professional testing
Source: bioRxiv or medRxiv preprint supplement (doi:10.1101/2021.01.06.20249009), 2021-01-08
Supplement: Supplementary file [file media-2.pdf]

# Instruction Self-Test-Study

Version 1 – 30.11.20

English

# Please check if the following test components are available

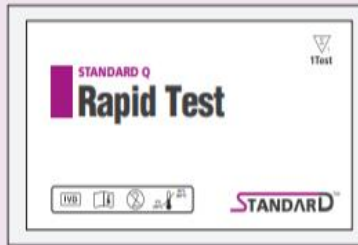

**Test device**  
(individually in a foil  
pouch with desiccant)

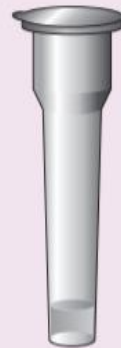

**Extraction buffer  
tube**

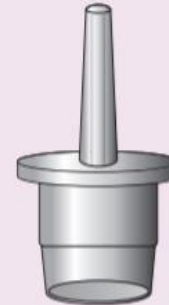

**Nozzle cap**

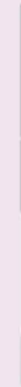

**Sterile swab**

# Test procedure I

1. Open the extraction buffer tube and insert the swab **with the cotton part first**.
2. While **squeezing the buffer tube in the lower part**, stir the swab more **than 10 times**. (1).
3. **Remove the swab while squeezing the sides of the tube in the lower part** to extract the liquid from the swab (2).
4. Press the nozzle cap tightly onto the tube (3).

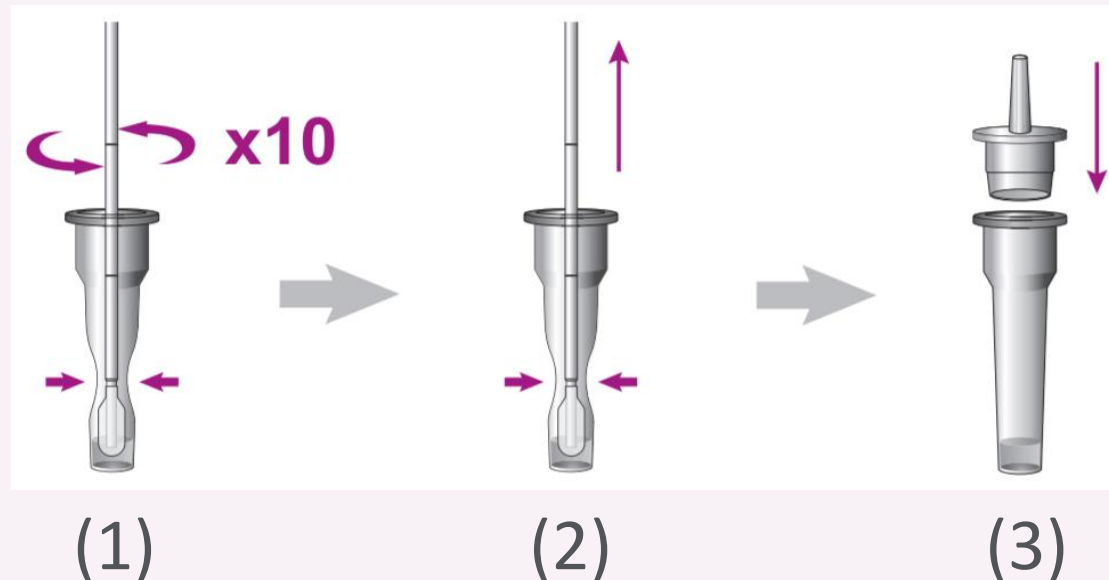

# Test procedure II

5. Check the expiry date on the back of the foil pouch (1).
6. Open the foil pouch of the test card at the **tear line** (2) and put the test device on the table.
7. Ensure that the **desiccant** status indicator shows valid (yellow) (4).

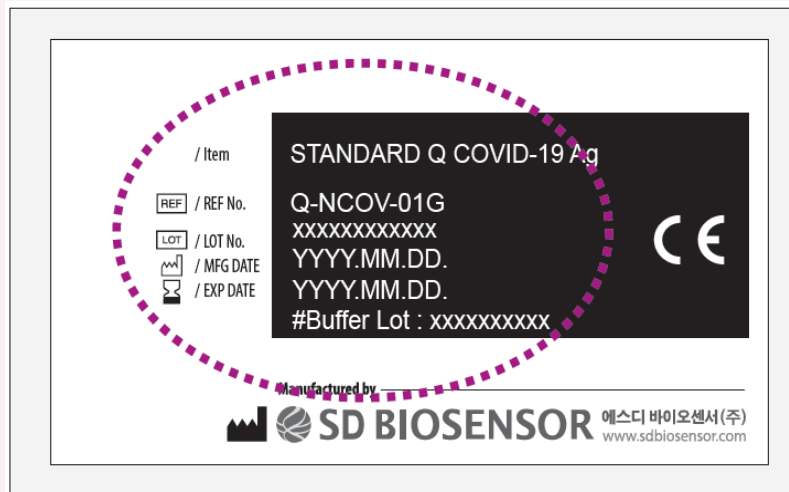

(1)

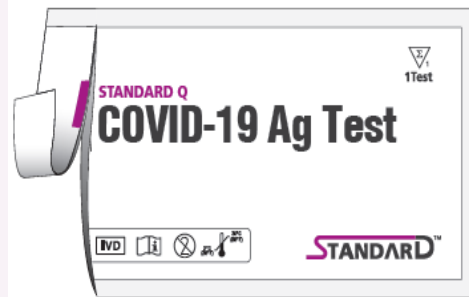

(2)

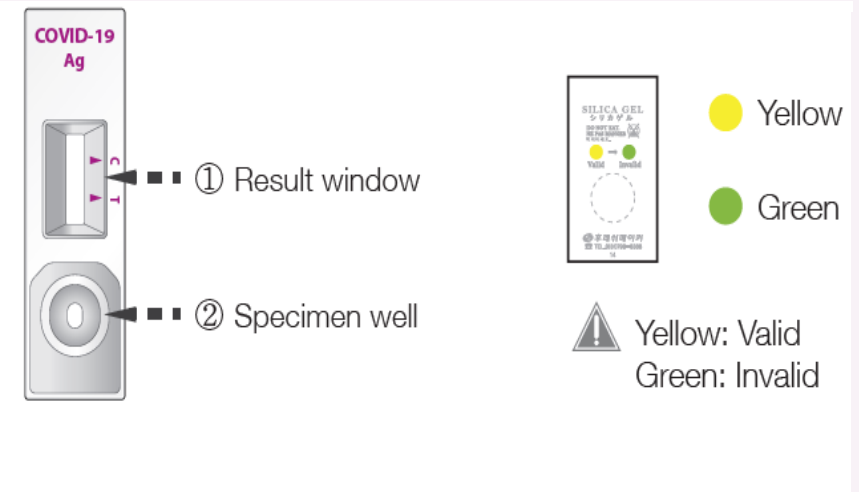

(3)

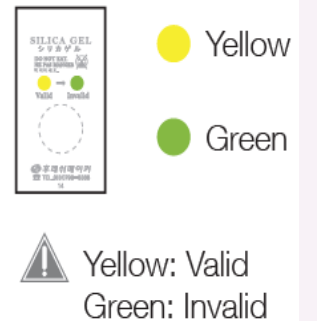

(4)

# Test procedure III

8. Place the test **horizontally** in front of you as shown in figure (1).
9. Hold the tube **vertically over the marked round field** (not the rectangle result window) (1).
10. Squeeze the tube for applying **4 drops** of extracted specimen to the specimen well of the test device (1). (You can also continue the test if you have accidentally applied 5 drops)
11. Set the timer and read test result at 15 min (2).

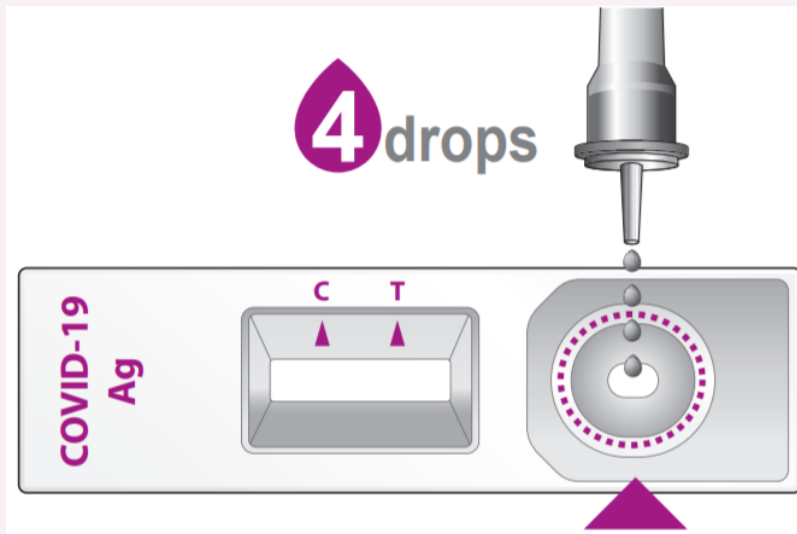

(1)

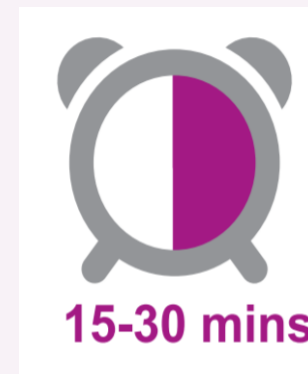

(2)

# Interpretation

| Test Result     | Example                                                                            | Description                                                                                                                                                                               |
|-----------------|------------------------------------------------------------------------------------|-------------------------------------------------------------------------------------------------------------------------------------------------------------------------------------------|
| <b>Negative</b> | 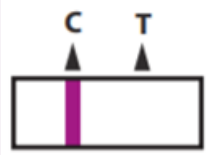  | <b>Negative:</b> A colored band will appear in the left section of the result window to show that the test is working properly. This band is control line (C).<br>-> no sign of infection |
| <b>Positive</b> |   | <b>Positive:</b> A colored band will appear in the right section of the result window. This band is test line of SARS-CoV-2 antigen (T).<br>-> sign of infection                          |
| <b>Invalid</b>  |  | <b>Invalid:</b> If no control line (C) is visible, the result is considered invalid.<br>-> the test is not working properly                                                               |

**-> Also pay attention to faint lines <-**

Weak (pale) or irregular lines should also be considered.
