# Supplementary material for: SARS-CoV-2 patient self-testing with an antigen-detecting rapid test: a head-to-head comparison with professional testing
Source: bioRxiv or medRxiv preprint supplement (doi:10.1101/2021.01.06.20249009), 2021-01-08
Supplement: Supplementary file [file media-3.pdf]

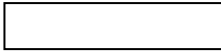

(Version vom 06.12.2020)

We are very thankful for your participation in the study. While waiting for the result of the antigen test ("rapid test"), please answer the following questions. We will evaluate your data pseudonymously, without being able to draw any conclusions about your person. **Thank you!**

➤ Profession: \_\_\_\_\_

- 2. Test evaluation** *scale from 1 to 5, only one mark per question*

- CHARITÉ - UNIVERSITÄTSMEDIZIN BERLIN  
Gliedkörperschaft der Freien Universität und der Humboldt-Universität zu Berlin

- Was there a **personal reason** that made it **difficult** for you to perform the test?  
(e.g. visual impairment, disturbance of fine motor skills)?
- 

- Do you have a **suggestion for improvement** to simplify the test?
- 

### 3. School / education

- What is your highest **general school qualification**?
- ☐ lower secondary school (Hauptschule)
  - ☐ intermediate secondary school (mittlerer Schulabschluss)
  - ☐ (specialised) upper secondary school (Fachhochschulreife, Abitur)
  - ☐ other: \_\_\_\_\_
- Do you have a **certificate of education for a certain profession / vocational degree**?  
[e.g. apprenticeship (Lehre), vocational school (Berufsfachschule), technical college, training for civil servants)?
- ☐ YES, namely \_\_\_\_\_ ☐ NO
- Do you have a **higher education degree**? [e.g. university, specialised college of higher education (Fachhochschule) college of advanced vocational studies (Berufsakademie)]
- ☐ YES, namely \_\_\_\_\_ ☐ NO
- **Other** educational degree: \_\_\_\_\_

### 4. Language

- What is your **native language**?
- ☐ English ☐ other: \_\_\_\_\_
- If you have another mother tongue, how good is your use of English?
- ☐ **Basic** user
    - ↳ ☐ A1: beginner
    - ☐ A2: elementary
  - ☐ **Independent** user
    - ↳ ☐ B1: intermediate and
    - ☐ B2: upper intermediate
  - ☐ **Proficient** User
    - ↳ ☐ C1: advanced
    - ☐ C2: mastery
